# Supplementary material for: Cross-oncopanel study reveals high sensitivity and accuracy with overall analytical performance depending on genomic regions
Source: PubMed Central journal article supplement (PMC8051090; doi:10.1186/s13059-021-02315-0), 2021-04-16
Supplement: 13059_2021_2315_MOESM1_ESM.pdf [file 13059_2021_2315_MOESM1_ESM.pdf]

**Table S1: Detailed information for eight participating pan-cancer panels**

| Panel code | Panel name*                                       | List of test labs                      | Size (Kbp) | Gene count | Genome version | DNA input (ng) |
|------------|---------------------------------------------------|----------------------------------------|------------|------------|----------------|----------------|
| AGL        | Agilent Custom Comprehensive Cancer Panel v2      | ST01/ST02/ST03                         | 7,625      | 1058       | hg19           | 30             |
| BRP        | Burning Rock DX OncoScreen Plus                   | ST25 <sup>†</sup> /ST26/ST27/ST28      | 1,631      | 523        | hg19           | 100            |
| IDT        | Integrated DNA Technologies xGen Pan-Cancer Panel | ST04/ST05/ST06                         | 780        | 127        | hg19           | 100            |
| IGT        | iGeneTech AIOnco-seq                              | ST07/ST08/ST09                         | 944        | 113        | hg19           | 100            |
| ILM        | Illumina TruSight Tumor 170                       | ST10/ST11 <sup>‡</sup> /ST12/ST23/ST29 | 527        | 154        | hg19           | 50             |
| QGN        | QIAGEN Human Comprehensive cancer panel           | ST13/ST14/ST15                         | 837        | 275        | hg19           | 40             |
| ROC        | Roche SeqCap EZ Choice custom PHC Panel           | ST16/ST17 <sup>§</sup> /ST18/ST19      | 149        | 45         | hg38           | 100            |
| TFS        | Thermo Fisher OncoPrint Comprehensive Assay v3    | ST22/ST23/ST24                         | 349        | 146        | hg19           | 20             |

(continue...)

| Panel code | UMI                       | Fragmentation approach                                   | Median fragment size (bp) |
|------------|---------------------------|----------------------------------------------------------|---------------------------|
| AGL        | Yes (for deduplication)   | Covaris E220 instrument / Focused-Ultrasonicators        | 350                       |
| BRP        | No                        | Covaris M220/Focused-Ultrasonicators with AFA Technology | 265                       |
| IDT        | No                        | Covaris / Focused-Ultrasonicators                        | 300                       |
| IGT        | No                        | Covaris / Focused-Ultrasonicators                        | 200 (150-250)             |
| ILM        | No                        | Covaris / Focused-Ultrasonicators                        | 170 (90-250)              |
| QGN        | Yes (for error reduction) | QIAGEN Fx enzymatic fragmentation module                 | 183                       |
| ROC        | Yes (for deduplication)   | Kapa Plus enzyme                                         | 187                       |
| TFS        | No                        | No fragmentation as PCR based target amplification       | 156                       |

(continue...)

| Panel code | Enrichment                                                                                                                 | Sequencing platform | Read length      | Avg. read count |
|------------|----------------------------------------------------------------------------------------------------------------------------|---------------------|------------------|-----------------|
| AGL        | capture based/Agilent SureSelectXT HS Target Enrichment System                                                             | NovaSeq             | 2 x 150bp        | 362,985,832     |
| BRP        | capture based                                                                                                              | NovaSeq             | 2 x 150bp        | 89,735,363      |
| IDT        | capture based                                                                                                              | NovaSeq             | 2 x 150bp        | 124,947,599     |
| IGT        | capture based                                                                                                              | HiSeq2500           | 2 x 125bp        | 101,613,666     |
| ILM        | capture based                                                                                                              | NextSeq             | 2 x 101bp        | >100 million    |
| QGN        | one end randomly fragmented and adapter ligated, other end gene specific primer, single primer extension and universal PCR | NovaSeq             | 2 x 150bp        | 141,196,120     |
| ROC        | capture based                                                                                                              | NovaSeq             | 2 x 150bp        | 422,956,489     |
| TFS        | amplicon based                                                                                                             | IonTorrent S5       | 113 bp (average) | 10,765,203      |

(continue...)

| Panel code | Avg. raw read coverage | Avg. coverage after deduplication                                                           | Read mapping tool  | Variant caller                      | VAF threshold    |
|------------|------------------------|---------------------------------------------------------------------------------------------|--------------------|-------------------------------------|------------------|
| AGL        | 7,141                  | 3,550                                                                                       | bwa mem v0.7.17    | GATK 4.0.10.0 Mutect2               | 1%               |
| BRP        | 4,682                  | 2,194                                                                                       | BWA aligner 0.7.10 | VarScan v2.4.3                      | 1%               |
| IDT        | 10,179                 | 3,026                                                                                       | bwa-mem v0.7.15    | AstraZeneca VarDict v1.4.8          | 2%               |
| IGT        | 7,359                  | 4,508                                                                                       | bwa mem v0.7.12    | VarScan.v2.3.7                      | 1%               |
| ILM        | 9,880                  | 1,412                                                                                       | iSAAC aligner      | Pisces variant caller               | 2.6%             |
| QGN        | 22,868                 | 2,431                                                                                       | BWA-MEM            | UMI-aware variant caller smCounter2 | No <sup>  </sup> |
| ROC        | >30,000                | 5,767                                                                                       | BWA 0.7.17         | GATK 4.1.0.0 Mutect2                | 2.5%             |
| TFS        | 3,191                  | We do not de duplicate bars for variant calling rather TVC maxes out at read depth of 2000x | TMAP               | Torrent Variant Caller (TVC)        | 2.5%             |

\*All participating panels are for research use only.

<sup>†</sup> ST25 was excluded from performance analysis as it is a clinical lab closely affiliated with the panel provider.

<sup>‡</sup> ST11 was excluded from performance analysis due to an extended delay in experiment execution and data generation.

<sup>§</sup> ST17 was excluded from performance analysis due to over fragmentation of DNA samples during library preparation.

<sup>||</sup> QGN's UMI-aware variant caller is able to call variants with VAF as low as 0.5%.

**Table S2: 95% confidence interval for reported sensitivity across VAF ranges for SNVs in the consensus targeted region (CTR).**

| VAF range   | Sample A       |                |                |               | Sample C       |                |               |               | Spike-in       |
|-------------|----------------|----------------|----------------|---------------|----------------|----------------|---------------|---------------|----------------|
|             | 1-2.5%         | 2.5-5%         | 5-10%          | 10-20%        | 1-2.5%         | 2.5-5%         | 5-10%         | 10-20%        | ~5%            |
| <b>AGL</b>  | [84.4%, 89.6%] | [96.1%, 97.4]  | [98.2%, 99.3%] | [99.9%, 100%] | [89.6%, 91.5%] | [97.6%, 98.9%] | [98.7%, 100%] | [98.6%, 100%] | [95.9%, 98.4%] |
| <b>BRP</b>  | [91.2%, 97.4%] | [99.0%, 100%]  | [99.9%, 100%]  | *             | [93.4%, 96.1%] | [99.8%, 100%]  | *             | *             | [99.9%, 100%]  |
| <b>IDT†</b> | N/A            | [97.2%, 99.5%] | *              | *             | N/A            | [96.7%, 99.5%] | *             | *             | [96.9%, 98.9%] |
| <b>IGT</b>  | [92.4%, 100%]  | *              | *              | *             | [97.3%, 99.0%] | *              | *             | *             | *              |
| <b>ILM†</b> | N/A            | [85.6%, 91.8%] | [96.5%, 99.7%] | [99.5%, 100%] | N/A            | [80.1%, 98.2%] | [99.4%, 100%] | [90.1%, 100%] | [92.8%, 95.9%] |
| <b>QGN</b>  | [91.4%, 97.6%] | [99.0%, 99.8%] | [99.0%, 100%]  | *             | [94.3%, 96.6%] | [99.1%, 100%]  | *             | [98.1%, 100%] | [92.2%, 96.4%] |
| <b>ROC†</b> | N/A            | [80.7%, 95.5%] | *              | *             | N/A            | [69.2%, 94.3%] | *             | *             | [84.4%, 91.3%] |
| <b>TFS†</b> | N/A            | [88.8%, 95.8%] | [99.5%, 100%]  | *             | NOT TESTED     |                |               |               | [99.5%, 100%]  |

\* The estimate for sensitivity is 100% across all libraries thus bootstrap resampling is not applicable for calculating the confidence interval.

† For the panels with a built-in VAF threshold, "N/A" is listed if the VAF range's low bound is much lower than the panel provider's chosen VAF threshold. The VAF threshold is 2.0% for IDT, 2.6% for ILM, 2.5% for ROC, and 2.5% for TFS.

**Table S3: 95% confidence interval for reported sensitivity in detecting known SNVs and other variants of expected VAF between 2.5% and 20%.**

| <i>Variant type</i> | Sample A       |                       | Sample C       |                       |
|---------------------|----------------|-----------------------|----------------|-----------------------|
|                     | SNV            | Small indels or MNVSs | SNV            | Small indels or MNVSs |
| <b>AGL</b>          | [97.5%, 98.3%] | [88.2%, 98.6%]        | [98.3%, 99.3%] | [87.3%, 100%]         |
| <b>BRP</b>          | [99.4%, 99.9%] | *                     | [99.7%, 100%]  | *                     |
| <b>IDT</b>          | [98.5%, 99.8%] | *                     | [98.3%, 99.6%] | *                     |
| <b>IGT</b>          | *              | *                     | *              | *                     |
| <b>ILM</b>          | [92.0%, 95.4%] | [94.3%, 99.0%]        | [88.6%, 94.0%] | [48.4%, 100%]         |
| <b>QGN</b>          | [99.3%, 99.8%] | *                     | [99.3%, 99.9%] | *                     |
| <b>ROC</b>          | [91.1%, 98.1%] | *                     | [87.0%, 97.8%] | [25%, 100%]           |

\* The estimate for sensitivity is 100% across all libraries thus bootstrap resampling is not applicable for calculating the confidence interval.

**Table S4: 95% confidence interval for reported sensitivity in detecting known SNVs within the CTR of expected VAF between 2.5% and 5% after applying the artificially VAF cutoff at 1.5%, 2.0% and 2.5%.**

| Artificially applying VAF cutoff | Sample A       |                |                |                | Sample C       |                |                |                |
|----------------------------------|----------------|----------------|----------------|----------------|----------------|----------------|----------------|----------------|
|                                  | >2.5%          | >2%            | >1.5%          | >1%            | >2.5%          | >2%            | >1.5%          | >1%            |
| <b>AGL</b>                       | [88.4%, 90.5%] | [93.5%, 95.1%] | [95.5%, 96.9%] | [96.0%, 97.3%] | [84.5%, 87.9%] | [92.7%, 94.8%] | [96.5%, 98.0%] | [97.3%, 98.8%] |
| <b>BRP</b>                       | [88.2%, 92.1%] | [96.1%, 98.1%] | [98.5%, 99.6%] | [99.0%, 99.9%] | [85.5%, 91.0%] | [95.0%, 97.6%] | [99.1%, 99.8%] | [99.5%, 100%]  |
| <b>IDT†</b>                      | [93.4%, 97.9%] | [97.3%, 99.6%] | N/A            | N/A            | [83.8%, 94.2%] | [97.0%, 99.4%] | N/A            | N/A            |
| <b>IGT</b>                       | [93.2%, 97.9%] | [98.7%, 99.9%] | *              | *              | [91.9%, 97.6%] | [99.7%, 100%]  | *              | *              |
| <b>QGN</b>                       | [93.3%, 96.6%] | [97.5%, 99.0%] | [98.8%, 100%]  | [99.0%, 99.8%] | [86.6%, 92.7%] | [95.9%, 98.5%] | [98.7%, 99.8%] | [99.1%, 99.9%] |

(continue...)

| Artificially applying VAF cutoff | Spike-in       |                |                |                |
|----------------------------------|----------------|----------------|----------------|----------------|
|                                  | >2.5%          | >2%            | >1.5%          | >1%            |
| <b>AGL</b>                       | [92.9%, 95.6%] | [95.2%, 97.5%] | [95.9%, 98.2%] | [96.1%, 98.3%] |
| <b>BRP</b>                       | [96.6%, 98.6%] | [97.9%, 99.5%] | [98.4%, 99.8%] | [98.9%, 100%]  |
| <b>IDT†</b>                      | [95.5%, 97.9%] | [97.0%, 98.8%] | N/A            | N/A            |
| <b>IGT</b>                       | [98.3%, 99.8%] | [98.8%, 100%]  | [98.8%, 100%]  | [99.0%, 100%]  |
| <b>QGN</b>                       | [88.1%, 92.9%] | [89.6%, 94.2%] | [99.3%, 99.8%] | [90.8%, 95.1%] |

\* The estimate for sensitivity is 100% across all libraries thus bootstrap resampling is not applicable for calculating the confidence interval.

† "N/A" is listed in some VAF ranges for IDT if IDT's chosen VAF threshold, 2.0%, is much higher than the VAF range's low bound.

**Table S5: Sensitivity across VAF ranges for all samples after applying the artificial VAF cutoff**

**a Sensitivity with the artificial VAF cutoff at 1.5%**

| KP AF range | Sample A |       |        |       |       |       |        |       | Sample C   |       |        |       |       |       |        |       | Spike-in |       |
|-------------|----------|-------|--------|-------|-------|-------|--------|-------|------------|-------|--------|-------|-------|-------|--------|-------|----------|-------|
|             | 1-2.5%   |       | 2.5-5% |       | 5-10% |       | 10-20% |       | 1-2.5%     |       | 2.5-5% |       | 5-10% |       | 10-20% |       | ~5%      |       |
| AGL         | 207      | 75.5% | 1,002  | 96.3% | 628   | 98.6% | 395    | 99.8% | 1,102      | 78.3% | 572    | 97.3% | 300   | 99.4% | 246    | 99.6% | 483      | 97.1% |
| BRP         | 83       | 77.3% | 431    | 99.1% | 269   | 99.9% | 170    | 100%  | 470        | 80.8% | 251    | 99.5% | 132   | 100%  | 99     | 99.9% | 488      | 99.2% |
| IDT         | 31       | NA    | 156    | 95.8% | 88    | 100%  | 51     | 100%  | 175        | NA    | 82     | 89.4% | 40    | 100%  | 36     | 99.7% | 246      | 96.8% |
| IGT         | 24       | 90.3% | 140    | 100%  | 81    | 100%  | 53     | 100%  | 155        | 86.8% | 77     | 100%  | 40    | 100%  | 33     | 100%  | 429      | 99.5% |
| ILM         | 40       | NA    | 199    | 88.8% | 113   | 98.5% | 83     | 99.9% | 222        | NA    | 106    | 84.6% | 63    | 99.8% | 39     | 95.8% | 477      | 93.4% |
| QGN         | 68       | 81.7% | 317    | 99.3% | 197   | 99.5% | 104    | 100%  | 356        | 83.7% | 184    | 99.3% | 84    | 100%  | 73     | 99.4% | 373      | 92.6% |
| ROC         | 17       | NA    | 54     | 89.5% | 36    | 100%  | 28     | 100%  | 66         | NA    | 34     | 83.6% | 23    | 100%  | 11     | 100%  | 335      | 85.9% |
| TFS         | 22       | NA    | 125    | 91.9% | 58    | 99.7% | 42     | 97.6% | NOT TESTED |       |        |       |       |       |        |       | 244      | 98.7% |

**b Sensitivity with the artificial VAF cutoff at 2%**

| KP AF range | Sample A |       |        |       |       |       |        |       | Sample C   |       |        |       |       |       |        |       | Spike-in |       |
|-------------|----------|-------|--------|-------|-------|-------|--------|-------|------------|-------|--------|-------|-------|-------|--------|-------|----------|-------|
|             | 1-2.5%   |       | 2.5-5% |       | 5-10% |       | 10-20% |       | 1-2.5%     |       | 2.5-5% |       | 5-10% |       | 10-20% |       | ~5%      |       |
| AGL         | 207      | 55.9% | 1,002  | 94.3% | 628   | 98.6% | 395    | 99.7% | 1,102      | 55.2% | 572    | 93.8% | 300   | 99.4% | 246    | 99.6% | 483      | 96.4% |
| BRP         | 83       | 48.0% | 431    | 97.2% | 269   | 99.8% | 170    | 100%  | 470        | 52.4% | 251    | 96.4% | 132   | 100%  | 99     | 99.9% | 488      | 98.8% |
| IDT         | 31       | NA    | 156    | 95.8% | 88    | 100%  | 51     | 100%  | 175        | NA    | 82     | 89.4% | 40    | 100%  | 36     | 99.7% | 246      | 96.8% |
| IGT         | 24       | 70.5% | 140    | 99.4% | 81    | 100%  | 53     | 100%  | 155        | 66.0% | 77     | 99.9% | 40    | 100%  | 33     | 100%  | 429      | 99.5% |
| ILM         | 40       | NA    | 199    | 88.8% | 113   | 98.5% | 83     | 99.8% | 222        | NA    | 106    | 84.6% | 63    | 99.8% | 39     | 95.8% | 477      | 93.4% |
| QGN         | 68       | 59.3% | 317    | 98.3% | 197   | 99.5% | 104    | 100%  | 356        | 59.1% | 184    | 97.3% | 84    | 100%  | 73     | 99.4% | 373      | 92.0% |
| ROC         | 17       | NA    | 54     | 89.5% | 36    | 100%  | 28     | 100%  | 66         | NA    | 34     | 83.6% | 23    | 100%  | 11     | 100%  | 335      | 85.9% |
| TFS         | 22       | NA    | 125    | 91.9% | 58    | 99.7% | 42     | 97.6% | NOT TESTED |       |        |       |       |       |        |       | 244      | 98.7% |

**c Sensitivity with the artificial VAF cutoff at 2.5%**

| KP AF range | Sample A |       |        |       |       |       |        |       | Sample C   |       |        |       |       |       |        |       | Spike-in |       |
|-------------|----------|-------|--------|-------|-------|-------|--------|-------|------------|-------|--------|-------|-------|-------|--------|-------|----------|-------|
|             | 1-2.5%   |       | 2.5-5% |       | 5-10% |       | 10-20% |       | 1-2.5%     |       | 2.5-5% |       | 5-10% |       | 10-20% |       | ~5%      |       |
| AGL         | 207      | 32.7% | 1,002  | 89.5% | 628   | 98.4% | 395    | 99.7% | 1,102      | 30.3% | 572    | 86.2% | 300   | 99.3% | 246    | 99.6% | 483      | 94.3% |
| BRP         | 83       | 19.2% | 431    | 90.2% | 269   | 99.8% | 170    | 100%  | 470        | 22.4% | 251    | 88.3% | 132   | 100%  | 99     | 99.9% | 488      | 97.7% |
| IDT         | 31       | NA    | 156    | 95.8% | 88    | 100%  | 51     | 100%  | 175        | NA    | 82     | 89.4% | 40    | 100%  | 36     | 99.7% | 246      | 96.8% |
| IGT         | 24       | 23.3% | 140    | 95.7% | 81    | 100%  | 53     | 100%  | 155        | 25.2% | 77     | 95.0% | 40    | 100%  | 33     | 100%  | 429      | 99.1% |
| ILM         | 40       | NA    | 199    | 88.8% | 113   | 98.5% | 83     | 99.8% | 222        | NA    | 106    | 84.6% | 63    | 99.8% | 39     | 95.8% | 477      | 93.4% |
| QGN         | 68       | 23.8% | 317    | 95.0% | 197   | 99.5% | 104    | 100%  | 356        | 23.9% | 184    | 89.7% | 84    | 100%  | 73     | 99.4% | 373      | 90.6% |
| ROC         | 17       | NA    | 54     | 89.5% | 36    | 100%  | 28     | 100%  | 66         | NA    | 34     | 83.6% | 23    | 100%  | 11     | 100%  | 335      | 85.9% |
| TFS         | 22       | NA    | 125    | 91.9% | 58    | 99.7% | 42     | 97.6% | NOT TESTED |       |        |       |       |       |        |       | 244      | 98.7% |

**Table S6: 95% confidence interval for reported sensitivity within the CTR or HC\_CR (more specifically, in HC\_CR beyond the CTR) in detecting known positives of expected VAF between 2.5% and 20%.**

| <i>Variant type</i> | Sample A       |                     | Sample C       |                     |
|---------------------|----------------|---------------------|----------------|---------------------|
|                     | within CTR     | in HC_CR beyond CTR | within CTR     | in HC_CR beyond CTR |
| <b>AGL</b>          | [97.6%, 98.3%] | [91.8%, 98.8%]      | [98.3%, 99.3%] | [95.3%, 100%]       |
| <b>BRP</b>          | [99.5%, 100%]  | [97.6%, 100%]       | [99.9%, 100%]  | [97.7%, 100%]       |
| <b>IDT</b>          | [98.5%, 99.8%] | *                   | [98.3%, 99.7%] | [96.8%, 100%]       |
| <b>IGT</b>          | *              | *                   | *              | *                   |
| <b>ILM</b>          | [92.2%, 95.5%] | [81.6%, 100%]       | [88.0%, 93.7%] | [86.8%, 100%]       |
| <b>QGN</b>          | [99.3%, 99.8%] | [98.7%, 100%]       | [99.3%, 99.9%] | [99.0%, 100%]       |
| <b>ROC</b>          | [91.1%, 98.0%] | *                   | [83.0%, 96.6%] | *                   |
| <b>TFS</b>          | [92.2%, 97.0%] | [97.9%, 100%]       | NOT TESTED     |                     |

\* The estimate for sensitivity is 100% across all libraries thus bootstrap resampling is not applicable for calculating the confidence interval.
